# Supplementary material for: Monte Carlo drift correction – quantifying the drift uncertainty of global climate models
Source: Copernicus journal article supplement (doi:10.5194/gmd-16-6593-2023), 2023-11-16
Supplement: Supplementary file 1 [file gmd-16-6593-2023-supplement.pdf]

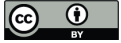

*Supplement of*

## **Monte Carlo drift correction – quantifying the drift uncertainty of global climate models**

**Benjamin S. Grandey et al.**

*Correspondence to:* Benjamin S. Grandey ([benjamin.grandey@ntu.edu.sg](mailto:benjamin.grandey@ntu.edu.sg))

The copyright of individual parts of the supplement might differ from the article licence.

Drift-corrected  $\Delta H$  (2000s) with drift uncertainty for the CMIP6 historical simulations

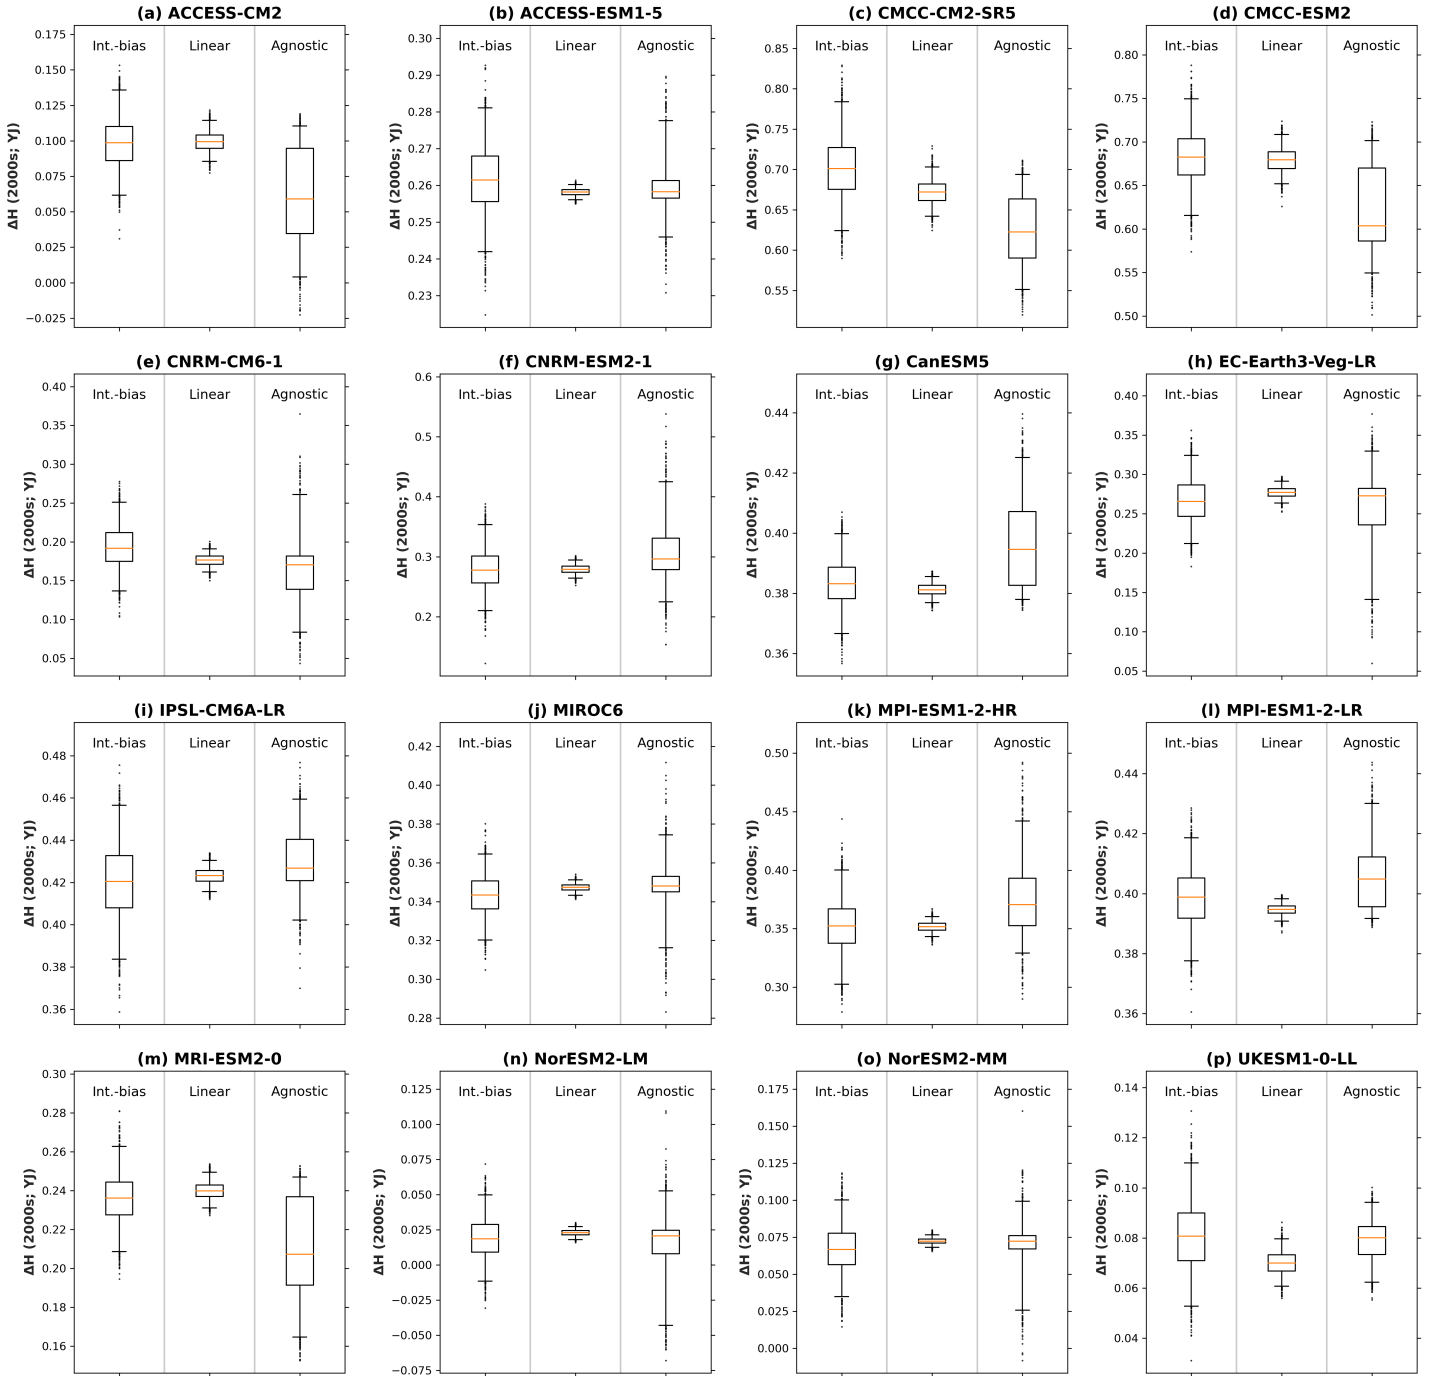

**Figure S1:** Drift-corrected excess ocean heat ( $\Delta H$ ) during the historical period and the corresponding drift uncertainty. We calculate  $\Delta H$  as the decadal mean for the 2000s relative to the 1850s. Each panel shows results for one CMIP6 model. Within each panel, each box plot shows results for one MCDC method. The central line shows the median, the box shows the inter-quartile range, the whiskers show the 2nd–98th inter-percentile range, and the dots show outliers beyond the range of the whiskers.

Drift-corrected  $\Delta Z$  (2000s) with drift uncertainty for the CMIP6 historical simulations

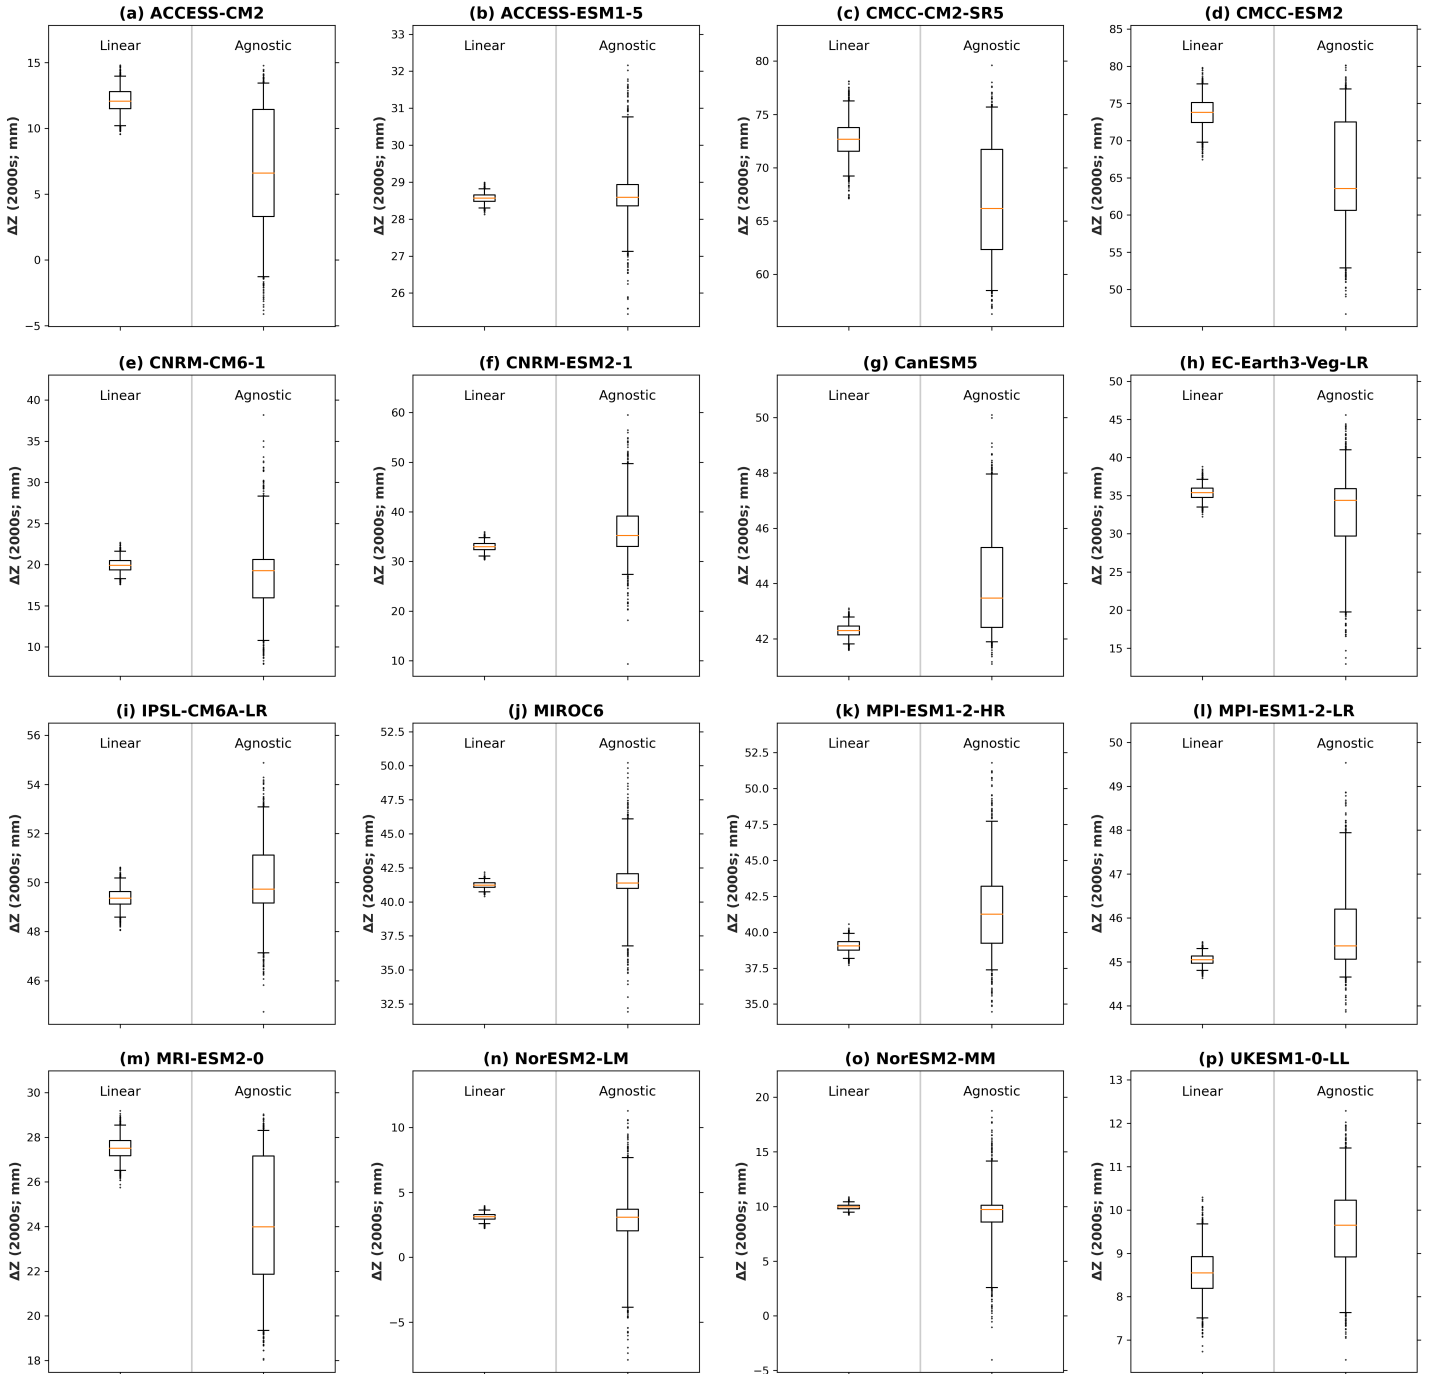

**Figure S2:** Drift-corrected thermosteric sea-level rise ( $\Delta Z$ ) during the historical period and the corresponding drift uncertainty. We calculate  $\Delta Z$  as the decadal mean for the 2000s relative to the 1850s. Each panel shows results for one CMIP6 model. Within each panel, each box plot shows results for one MCDC method. The central line shows the median, the box shows the inter-quartile range, the whiskers show the 2nd–98th inter-percentile range, and the dots show outliers beyond the range of the whiskers.

Drift-corrected  $\epsilon$  with drift uncertainty for the CMIP6 simulations

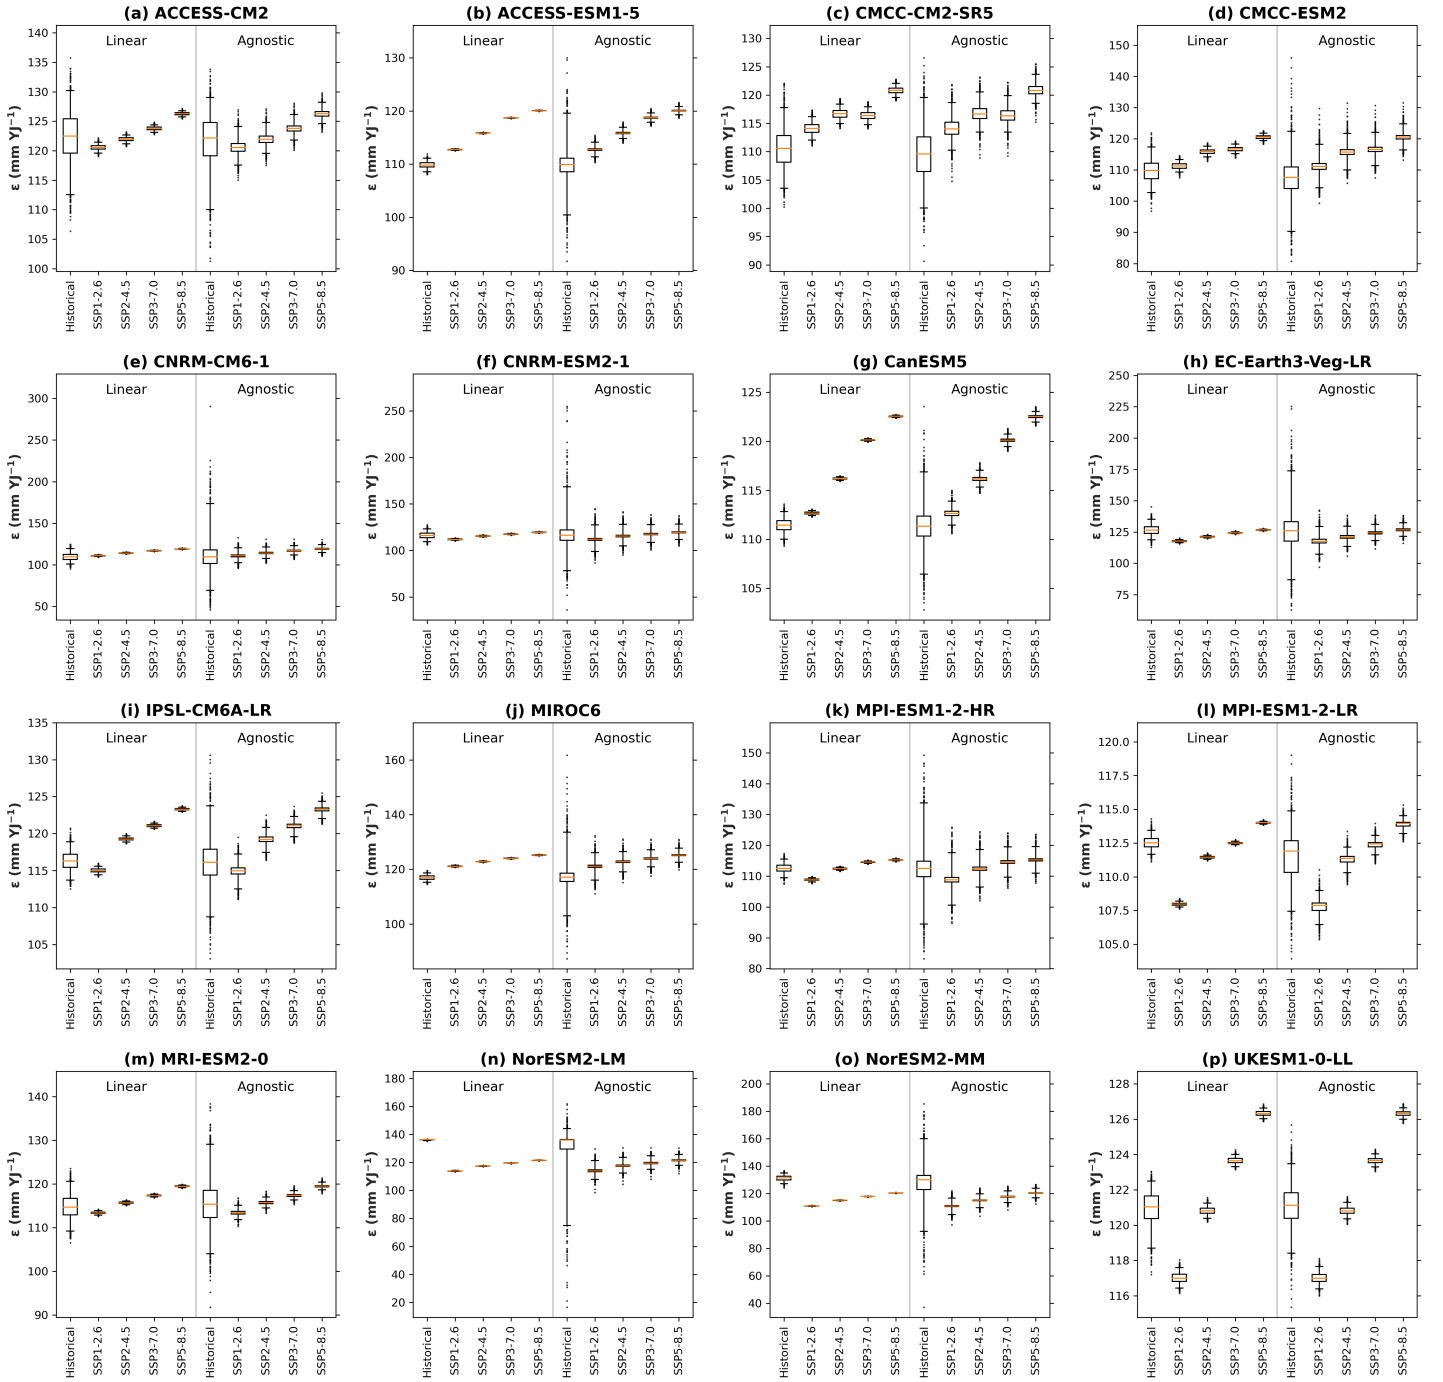

**Figure S3:** Drift-corrected estimates of the expansion efficiency of heat ( $\epsilon$ ) and the corresponding drift uncertainty. Each panel shows results for one CMIP6 model. Within each panel, each box plot shows results for one combination of MCDC method and projection scenario. The central line shows the median, the box shows the inter-quartile range, the whiskers show the 2nd–98th inter-percentile range, and the dots show outliers beyond the range of the whiskers.

**Table S1:** Coupled Model Intercomparison Project Phase 6 (CMIP6) models analysed in this study. “Control length” refers to the time series length of the pre-industrial control time series. The further information URLs also correspond to the control simulations.

| Model            | Variant  | Control length (yr) | Calendar            | Further information URL                                                                                                                                                                                           |
|------------------|----------|---------------------|---------------------|-------------------------------------------------------------------------------------------------------------------------------------------------------------------------------------------------------------------|
| ACCESS-CM2       | r1i1p1f1 | 500                 | proleptic gregorian | <a href="https://furtherinfo.es-doc.org/CMIP6.CSIRO-ARCCSS.ACCESS-CM2.piControl.none.r1i1p1f1">https://furtherinfo.es-doc.org/CMIP6.CSIRO-ARCCSS.ACCESS-CM2.piControl.none.r1i1p1f1</a>                           |
| ACCESS-ESM1-5    | r1i1p1f1 | 1000                | proleptic gregorian | <a href="https://furtherinfo.es-doc.org/CMIP6.CSIRO.ACCESS-ESM1-5.piControl.none.r1i1p1f1">https://furtherinfo.es-doc.org/CMIP6.CSIRO.ACCESS-ESM1-5.piControl.none.r1i1p1f1</a>                                   |
| CMCC-CM2-SR5     | r1i1p1f1 | 500                 | 365 day             | <a href="https://furtherinfo.es-doc.org/CMIP6.CMCC.CMCC-CM2-SR5.piControl.none.r1i1p1f1">https://furtherinfo.es-doc.org/CMIP6.CMCC.CMCC-CM2-SR5.piControl.none.r1i1p1f1</a>                                       |
| CMCC-ESM2        | r1i1p1f1 | 500                 | 365 day             | <a href="https://furtherinfo.es-doc.org/CMIP6.CMCC.CMCC-ESM2.piControl.none.r1i1p1f1">https://furtherinfo.es-doc.org/CMIP6.CMCC.CMCC-ESM2.piControl.none.r1i1p1f1</a>                                             |
| CNRM-CM6-1       | r1i1p1f2 | 500                 | gregorian           | <a href="https://furtherinfo.es-doc.org/CMIP6.CNRM-CERFACS.CNRM-CM6-1.piControl.none.r1i1p1f2">https://furtherinfo.es-doc.org/CMIP6.CNRM-CERFACS.CNRM-CM6-1.piControl.none.r1i1p1f2</a>                           |
| CNRM-ESM2-1      | r1i1p1f2 | 500                 | gregorian           | <a href="https://furtherinfo.es-doc.org/CMIP6.CNRM-CERFACS.CNRM-ESM2-1.piControl.none.r1i1p1f2">https://furtherinfo.es-doc.org/CMIP6.CNRM-CERFACS.CNRM-ESM2-1.piControl.none.r1i1p1f2</a>                         |
| CanESM5          | r1i1p1f1 | 1000                | 365 day             | <a href="https://furtherinfo.es-doc.org/CMIP6.CCCma.CanESM5.piControl.none.r1i1p1f1">https://furtherinfo.es-doc.org/CMIP6.CCCma.CanESM5.piControl.none.r1i1p1f1</a>                                               |
| EC-Earth3-Veg-LR | r1i1p1f1 | 501                 | proleptic gregorian | <a href="https://furtherinfo.es-doc.org/CMIP6.EC-Earth-Consortium.EC-Earth3-Veg-LR.piControl.none.r1i1p1f1">https://furtherinfo.es-doc.org/CMIP6.EC-Earth-Consortium.EC-Earth3-Veg-LR.piControl.none.r1i1p1f1</a> |
| IPSL-CM6A-LR     | r1i1p1f1 | 1000                | gregorian           | <a href="https://furtherinfo.es-doc.org/CMIP6.IPSL.IPSL-CM6A-LR.piControl.none.r1i1p1f1">https://furtherinfo.es-doc.org/CMIP6.IPSL.IPSL-CM6A-LR.piControl.none.r1i1p1f1</a>                                       |
| MIROC6           | r1i1p1f1 | 500                 | gregorian           | <a href="https://furtherinfo.es-doc.org/CMIP6.MIROC.MIROC6.piControl.none.r1i1p1f1">https://furtherinfo.es-doc.org/CMIP6.MIROC.MIROC6.piControl.none.r1i1p1f1</a>                                                 |
| MPI-ESM1-2-HR    | r1i1p1f1 | 500                 | proleptic gregorian | <a href="https://furtherinfo.es-doc.org/CMIP6.MPI-M.MPI-ESM1-2-HR.piControl.none.r1i1p1f1">https://furtherinfo.es-doc.org/CMIP6.MPI-M.MPI-ESM1-2-HR.piControl.none.r1i1p1f1</a>                                   |
| MPI-ESM1-2-LR    | r1i1p1f1 | 1000                | proleptic gregorian | <a href="https://furtherinfo.es-doc.org/CMIP6.MPI-M.MPI-ESM1-2-LR.piControl.none.r1i1p1f1">https://furtherinfo.es-doc.org/CMIP6.MPI-M.MPI-ESM1-2-LR.piControl.none.r1i1p1f1</a>                                   |
| MRI-ESM2-0       | r1i1p1f1 | 701                 | proleptic gregorian | <a href="https://furtherinfo.es-doc.org/CMIP6.MRI.MRI-ESM2-0.piControl.none.r1i1p1f1">https://furtherinfo.es-doc.org/CMIP6.MRI.MRI-ESM2-0.piControl.none.r1i1p1f1</a>                                             |
| NorESM2-LM       | r1i1p1f1 | 501                 | 365 day             | <a href="https://furtherinfo.es-doc.org/CMIP6.NCC.NorESM2-LM.piControl.none.r1i1p1f1">https://furtherinfo.es-doc.org/CMIP6.NCC.NorESM2-LM.piControl.none.r1i1p1f1</a>                                             |
| NorESM2-MM       | r1i1p1f1 | 500                 | 365 day             | <a href="https://furtherinfo.es-doc.org/CMIP6.NCC.NorESM2-MM.piControl.none.r1i1p1f1">https://furtherinfo.es-doc.org/CMIP6.NCC.NorESM2-MM.piControl.none.r1i1p1f1</a>                                             |
| UKESM1-0-LL      | r1i1p1f2 | 1100                | 360 day             | <a href="https://furtherinfo.es-doc.org/CMIP6.MOHC.UKESM1-0-LL.piControl.none.r1i1p1f2">https://furtherinfo.es-doc.org/CMIP6.MOHC.UKESM1-0-LL.piControl.none.r1i1p1f2</a>                                         |

**Table S2:** Sources of uncertainty in  $\Delta E$ . We calculate  $\Delta E$  as the decadal mean for the 2000s relative to the 1850s. For each drift-correction method and model, *drift uncertainty* corresponds to the 2nd–98th inter-percentile range. *Model uncertainty* corresponds to the inter-model range: (i) for each model, calculate the mean of the agnostic-method drift-corrected data, then (ii) calculate the inter-model range. The final three rows contain summary statistics: the minimum, median, and maximum of each column.

| Sources of uncertainty in $\Delta E$ (2000s; YJ) |                   |        |          |                   |
|--------------------------------------------------|-------------------|--------|----------|-------------------|
| Model or scenario                                | Drift uncertainty |        |          | Other uncertainty |
|                                                  | Int.-bias         | Linear | Agnostic | Model             |
| ACCESS-CM2                                       | 0.08              | 0.03   | 0.11     |                   |
| ACCESS-ESM1-5                                    | 0.04              | 0.00   | 0.03     |                   |
| CMCC-CM2-SR5                                     | 0.15              | 0.06   | 0.14     |                   |
| CMCC-ESM2                                        | 0.13              | 0.06   | 0.15     |                   |
| CNRM-CM6-1                                       | 0.10              | 0.02   | 0.15     |                   |
| CNRM-ESM2-1                                      | 0.12              | 0.02   | 0.15     |                   |
| CanESM5                                          | 0.03              | 0.01   | 0.05     |                   |
| EC-Earth3-Veg-LR                                 | 0.11              | 0.03   | 0.17     |                   |
| IPSL-CM6A-LR                                     | 0.08              | 0.02   | 0.06     |                   |
| MIROC6                                           | 0.04              | 0.01   | 0.06     |                   |
| MPI-ESM1-2-HR                                    | 0.10              | 0.02   | 0.11     |                   |
| MPI-ESM1-2-LR                                    | 0.04              | 0.01   | 0.03     |                   |
| MRI-ESM2-0                                       | 0.06              | 0.02   | 0.09     |                   |
| NorESM2-LM                                       | 0.06              | 0.01   | 0.10     |                   |
| NorESM2-MM                                       | 0.07              | 0.01   | 0.07     |                   |
| UKESM1-0-LL                                      | 0.06              | 0.02   | 0.03     |                   |
| Historical                                       |                   |        |          | 0.56              |
| Min                                              | 0.03              | 0.00   | 0.03     | 0.56              |
| Median                                           | 0.07              | 0.02   | 0.09     | 0.56              |
| Max                                              | 0.15              | 0.06   | 0.17     | 0.56              |

**Table S3:** Sources of uncertainty in  $\Delta H$ . We calculate  $\Delta H$  as the decadal mean for the 2000s relative to the 1850s. For each drift-correction method and model, *drift uncertainty* corresponds to the 2nd–98th inter-percentile range. *Model uncertainty* corresponds to the inter-model range: (i) for each model, calculate the mean of the agnostic-method drift-corrected data, then (ii) calculate the inter-model range. The final three rows contain summary statistics: the minimum, median, and maximum of each column.

| Sources of uncertainty in $\Delta H$ (2000s; YJ) |                   |        |          |                   |
|--------------------------------------------------|-------------------|--------|----------|-------------------|
| Model or scenario                                | Drift uncertainty |        |          | Other uncertainty |
|                                                  | Int.-bias         | Linear | Agnostic | Model             |
| ACCESS-CM2                                       | 0.07              | 0.03   | 0.11     |                   |
| ACCESS-ESM1-5                                    | 0.04              | 0.00   | 0.03     |                   |
| CMCC-CM2-SR5                                     | 0.16              | 0.06   | 0.14     |                   |
| CMCC-ESM2                                        | 0.13              | 0.06   | 0.15     |                   |
| CNRM-CM6-1                                       | 0.11              | 0.03   | 0.18     |                   |
| CNRM-ESM2-1                                      | 0.14              | 0.03   | 0.20     |                   |
| CanESM5                                          | 0.03              | 0.01   | 0.05     |                   |
| EC-Earth3-Veg-LR                                 | 0.11              | 0.03   | 0.19     |                   |
| IPSL-CM6A-LR                                     | 0.07              | 0.01   | 0.06     |                   |
| MIROC6                                           | 0.04              | 0.01   | 0.06     |                   |
| MPI-ESM1-2-HR                                    | 0.10              | 0.02   | 0.11     |                   |
| MPI-ESM1-2-LR                                    | 0.04              | 0.01   | 0.04     |                   |
| MRI-ESM2-0                                       | 0.05              | 0.02   | 0.08     |                   |
| NorESM2-LM                                       | 0.06              | 0.01   | 0.10     |                   |
| NorESM2-MM                                       | 0.07              | 0.01   | 0.07     |                   |
| UKESM1-0-LL                                      | 0.06              | 0.02   | 0.03     |                   |
| Historical                                       |                   |        |          | 0.61              |
| Min                                              | 0.03              | 0.00   | 0.03     | 0.61              |
| Median                                           | 0.07              | 0.02   | 0.08     | 0.61              |
| Max                                              | 0.16              | 0.06   | 0.20     | 0.61              |

**Table S4:** Sources of uncertainty in  $\Delta Z$ . We calculate  $\Delta Z$  as the decadal mean for the 2000s relative to the 1850s. For each drift-correction method and model, *drift uncertainty* corresponds to the 2nd–98th inter-percentile range. *Model uncertainty* corresponds to the inter-model range: (i) for each model, calculate the mean of the agnostic-method drift-corrected data, then (ii) calculate the inter-model range. The final three rows contain summary statistics: the minimum, median, and maximum of each column.

| Sources of uncertainty in $\Delta Z$ (2000s; mm) |                   |          |                   |
|--------------------------------------------------|-------------------|----------|-------------------|
| Model or scenario                                | Drift uncertainty |          | Other uncertainty |
|                                                  | Linear            | Agnostic | Model             |
| ACCESS-CM2                                       | 4                 | 15       |                   |
| ACCESS-ESM1-5                                    | 1                 | 4        |                   |
| CMCC-CM2-SR5                                     | 7                 | 17       |                   |
| CMCC-ESM2                                        | 8                 | 24       |                   |
| CNRM-CM6-1                                       | 3                 | 18       |                   |
| CNRM-ESM2-1                                      | 4                 | 22       |                   |
| CanESM5                                          | 1                 | 6        |                   |
| EC-Earth3-Veg-LR                                 | 4                 | 21       |                   |
| IPSL-CM6A-LR                                     | 2                 | 6        |                   |
| MIROC6                                           | 1                 | 9        |                   |
| MPI-ESM1-2-HR                                    | 2                 | 10       |                   |
| MPI-ESM1-2-LR                                    | 0                 | 3        |                   |
| MRI-ESM2-0                                       | 2                 | 9        |                   |
| NorESM2-LM                                       | 1                 | 12       |                   |
| NorESM2-MM                                       | 1                 | 12       |                   |
| UKESM1-0-LL                                      | 2                 | 4        |                   |
| Historical                                       |                   |          | 64                |
| Min                                              | 0                 | 3        | 64                |
| Median                                           | 2                 | 10       | 64                |
| Max                                              | 8                 | 24       | 64                |



**Table S5:** Sources of uncertainty in  $\eta$ . We calculate  $\eta$  for the period 2015 to 2100. For each drift-correction method and model, *drift uncertainty* corresponds to the 2nd–98th inter-percentile range: (i) for each projection scenario, calculate the 2nd–98th inter-percentile range of the drift-corrected data, then (ii) calculate the mean of this inter-percentile range by averaging across the projection scenarios. For each projection scenario, *model uncertainty* corresponds to the inter-model range: (i) for each model, calculate the mean of the agnostic-method drift-corrected data, then (ii) calculate the inter-model range. For each model, *scenario uncertainty* corresponds to the inter-scenario range: (i) for each projection scenario, calculate the mean of the agnostic-method drift-corrected data, then (ii) calculate the inter-scenario range. The final three rows contain summary statistics: the minimum, median, and maximum of each column.

| Sources of uncertainty in $\eta$ (unitless) |                   |        |          |                   |          |
|---------------------------------------------|-------------------|--------|----------|-------------------|----------|
| Model or scenario                           | Drift uncertainty |        |          | Other uncertainty |          |
|                                             | Int.-bias         | Linear | Agnostic | Model             | Scenario |
| ACCESS-CM2                                  | 0.03              | 0.01   | 0.04     |                   | 0.01     |
| ACCESS-ESM1-5                               | 0.01              | 0.00   | 0.02     |                   | 0.01     |
| CMCC-CM2-SR5                                | 0.07              | 0.03   | 0.06     |                   | 0.08     |
| CMCC-ESM2                                   | 0.06              | 0.02   | 0.08     |                   | 0.07     |
| CNRM-CM6-1                                  | 0.04              | 0.01   | 0.10     |                   | 0.01     |
| CNRM-ESM2-1                                 | 0.05              | 0.01   | 0.14     |                   | 0.01     |
| CanESM5                                     | 0.01              | 0.00   | 0.01     |                   | 0.01     |
| EC-Earth3-Veg-LR                            | 0.06              | 0.01   | 0.14     |                   | 0.01     |
| IPSL-CM6A-LR                                | 0.03              | 0.01   | 0.03     |                   | 0.02     |
| MIROC6                                      | 0.02              | 0.00   | 0.06     |                   | 0.01     |
| MPI-ESM1-2-HR                               | 0.05              | 0.01   | 0.12     |                   | 0.03     |
| MPI-ESM1-2-LR                               | 0.02              | 0.00   | 0.02     |                   | 0.01     |
| MRI-ESM2-0                                  | 0.02              | 0.01   | 0.02     |                   | 0.01     |
| NorESM2-LM                                  | 0.03              | 0.00   | 0.08     |                   | 0.03     |
| NorESM2-MM                                  | 0.03              | 0.00   | 0.07     |                   | 0.02     |
| UKESM1-0-LL                                 | 0.02              | 0.01   | 0.01     |                   | 0.01     |
| SSP1-2.6                                    |                   |        |          | 0.18              |          |
| SSP2-4.5                                    |                   |        |          | 0.17              |          |
| SSP3-7.0                                    |                   |        |          | 0.16              |          |
| SSP5-8.5                                    |                   |        |          | 0.18              |          |
| Min                                         | 0.01              | 0.00   | 0.01     | 0.16              | 0.01     |
| Median                                      | 0.03              | 0.01   | 0.06     | 0.17              | 0.01     |
| Max                                         | 0.07              | 0.03   | 0.14     | 0.18              | 0.08     |

**Table S6:** Sources of uncertainty in  $\epsilon$ . We calculate  $\epsilon$  for the period 2015 to 2100. For each drift-correction method and model, *drift uncertainty* corresponds to the 2nd–98th inter-percentile range: (i) for each projection scenario, calculate the 2nd–98th inter-percentile range of the drift-corrected data, then (ii) calculate the mean of this inter-percentile range by averaging across the projection scenarios. For each projection scenario, *model uncertainty* corresponds to the inter-model range: (i) for each model, calculate the mean of the agnostic-method drift-corrected data, then (ii) calculate the inter-model range. For each model, *scenario uncertainty* corresponds to the inter-scenario range: (i) for each projection scenario, calculate the mean of the agnostic-method drift-corrected data, then (ii) calculate the inter-scenario range. The final three rows contain summary statistics: the minimum, median, and maximum of each column.

| Sources of uncertainty in $\epsilon$ (mm YJ <sup>-1</sup> ) |                   |          |                   |          |
|-------------------------------------------------------------|-------------------|----------|-------------------|----------|
| Model or scenario                                           | Drift uncertainty |          | Other uncertainty |          |
|                                                             | Linear            | Agnostic | Model             | Scenario |
| ACCESS-CM2                                                  | 1                 | 5        |                   | 6        |
| ACCESS-ESM1-5                                               | 0                 | 2        |                   | 7        |
| CMCC-CM2-SR5                                                | 3                 | 7        |                   | 7        |
| CMCC-ESM2                                                   | 3                 | 11       |                   | 9        |
| CNRM-CM6-1                                                  | 2                 | 13       |                   | 8        |
| CNRM-ESM2-1                                                 | 2                 | 22       |                   | 7        |
| CanESM5                                                     | 0                 | 2        |                   | 10       |
| EC-Earth3-Veg-LR                                            | 2                 | 16       |                   | 9        |
| IPSL-CM6A-LR                                                | 1                 | 3        |                   | 8        |
| MIROC6                                                      | 0                 | 7        |                   | 4        |
| MPI-ESM1-2-HR                                               | 1                 | 12       |                   | 6        |
| MPI-ESM1-2-LR                                               | 0                 | 2        |                   | 6        |
| MRI-ESM2-0                                                  | 1                 | 2        |                   | 6        |
| NorESM2-LM                                                  | 1                 | 10       |                   | 7        |
| NorESM2-MM                                                  | 0                 | 9        |                   | 10       |
| UKESM1-0-LL                                                 | 1                 | 1        |                   | 9        |
| SSP1-2.6                                                    |                   |          | 13                |          |
| SSP2-4.5                                                    |                   |          | 11                |          |
| SSP3-7.0                                                    |                   |          | 12                |          |
| SSP5-8.5                                                    |                   |          | 13                |          |
| Min                                                         | 0                 | 1        | 11                | 4        |
| Median                                                      | 1                 | 7        | 12                | 7        |
| Max                                                         | 3                 | 22       | 13                | 10       |
